1     **First come, first served: Superinfection exclusion in Deformed wing virus is dependent**  
2                     **upon sequence identity and not the order of virus acquisition**

3             Olesya N Gusachenko\*, Luke Woodford, Katharin Balbirnie-Cumming, David J Evans  
4     Biomedical Sciences Research Complex, University of St. Andrews, North Haugh, St. Andrews,  
5                                             UK.

6     \*corresponding author

7     e-mail: [olesya.gusachenko@gmail.com](mailto:olesya.gusachenko@gmail.com)

8     address: University of St Andrews, North Haugh, St Andrews, KY16 9ST UK

9     tel: +44 (0)1334 463396

10            **Competing Interests and funding**

11            Authors declare no competing financial interests in relation to the work described. This  
12     work was supported by grant funding from BBSRC BB/M00337X/2 and BB/I000828/1.

13

14           **Abstract**

15           Deformed wing virus (DWV) is the most important globally distributed pathogen of honey  
16 bees and, when vectored by the ectoparasite *Varroa destructor*, is associated with high levels of  
17 colony losses. Divergent DWV types may differ in their pathogenicity and are reported to exhibit  
18 superinfection exclusion upon sequential infections, an inevitability in a *Varroa*-infested colony.  
19 We used a reverse genetic approach to investigate competition and interactions between  
20 genetically distinct or related virus strains, analysing viral load over time, tissue distribution with  
21 reporter gene-expressing viruses and recombination between virus variants. Transient  
22 competition occurred irrespective of the order of virus acquisition, indicating no directionality or  
23 dominance. Over longer periods, the ability to compete with a pre-existing infection correlated  
24 with the genetic divergence of the inoculae. Genetic recombination was observed throughout  
25 the DWV genome with recombinants accounting for ~2% of the population as determined by  
26 deep sequencing. We propose that superinfection exclusion, if it occurs at all, is a consequence  
27 of a cross-reactive RNAi response to the viruses involved, explaining the lack of dominance of  
28 one virus type over another. A better understanding of the consequences of dual- and  
29 superinfection will inform development of cross-protective honey bee vaccines and landscape-  
30 scale DWV transmission and evolution.

31           **Introduction**

32           Honey bees (*Apis mellifera*) are globally important pollinators of wild flowers and  
33 agricultural crops, and the source of honey, with annual global production worth in excess of  
34 \$7bn [1]. Both honey production and pollination services require strong, healthy colonies, which  
35 are threatened by a range of factors, but most significantly by disease. One of the major viral  
36 pathogens of honey bees is Deformed wing virus (DWV). When transmitted by the parasitic mite  
37 *Varroa destructor*, DWV is responsible for high overwinter colony losses, which can exceed  
38 37% annually [2]. Improvements to honey bee health, through direct control of virus

39 transmission or replication, require a better understanding of how the virus propagates within  
40 and between bees.

41 The historical identification and naming of DWV-like viruses imply a greater genetic  
42 divergence than subsequent molecular analysis has demonstrated. In 2004-2006 several  
43 picorna-like viruses with high levels of sequence identity were reported [3–5]. These viruses  
44 were initially named according to their origins; the virus from honey bees with characteristic  
45 wing deformities was termed DWV [4], a similar virus found in aggressive workers in Japan was  
46 designated Kakugo virus [3, 5] and analysis of *Varroa* mites yielded *Varroa destructor* virus type  
47 1 (VDV-1) [3]. Limited genetic divergence (~84-97% genomic RNA identity), similar infectivity in  
48 honey bees, and demonstrated ability to freely recombine during coinfections [6–9] resulted in  
49 them now being considered as different variants of DWV [6, 7, 10], albeit occupying two genetic  
50 branches (VDV-1-like and DWV-like) of the same phylogenetic tree [11]. To distinguish between  
51 these branches the terminology ‘type A’ and ‘type B’ has been adopted for DWV-like and VDV-  
52 1-like variants respectively. Evidence for the existence of a third type named DWV type C has  
53 also been reported [12].

54 DWV is ubiquitous in honey bees [13–15], with the possible exception of Australian  
55 colonies [16]. In the absence of *Varroa* the virus is transmitted horizontally, *per os*, and vertically  
56 from the infected queen and the drones [17]. With subsequent *Varroa* mite transmission it is  
57 therefore inevitable that the virus enters a host already harbouring one or multiple DWV  
58 variants. Current studies suggest that DWV infection can occur with several variants  
59 cocirculating in the same apiary, colony or individual honey bee host [18–21]. Although the type  
60 A and B variants appear to be differentially distributed, with type A frequently reported in the US  
61 and type B being commonly detected in European colonies [8, 13, 22], direct competition may  
62 occur where they cocirculate. If this competition has directionality it will influence the distribution  
63 and future spread of DWV at the landscape scale. While some studies of mixed DWV infections  
64 demonstrate no predominance of one variant over another [18, 23], others show possible

65 competition between the variants and higher accumulation of DWV B in infected bees [24]. In  
66 addition, superinfection exclusion (SIE) has been proposed, in which a pre-existing type B virus  
67 prevents the establishment of a type A infection at the colony level [10].

68 A recently developed reverse genetics (RG) system comprising a set of genetically  
69 tagged DWV variants and reporter gene-expressing viruses provides an opportunity to  
70 investigate coinfection kinetics and competition between DWV types [25]. Since SIE is a widely  
71 observed virological phenomenon [26–35], we extended these studies to assay dominance of  
72 one variant over another during sequential infection. Using reporter gene-expressing DWV we  
73 additionally investigated the influence of competition on tissue distribution of infection. We show  
74 that where competition is observed, manifest as reduced virus levels, it is reflected in reduced  
75 reporter gene expression at the cellular level. Notably we show that DWV accumulation during  
76 superinfection is influenced by the genetic identity between the viruses, rather than by a  
77 directionality of competition. Genetically divergent DWV variants (such as those representing  
78 type A and type B) exhibit transient competition, whilst viruses with greater identity (e.g. type  
79 A/B recombinants with either type A or type B) demonstrate distinctly more pronounced effect.  
80 We also analysed the occurrence and identity of recombinants during mixed infections and  
81 confirmed that these are present with junctions widely distributed throughout the genome.  
82 These studies provide further insights into the biology of DWV. In particular they address the  
83 consequences of co- and superinfection, an important consideration when transmitted by the  
84 ectoparasite *Varroa*. Our results indicate that genome identity is the determinant that defines the  
85 outcome of dual infections; this will inform studies of population transmission at the landscape  
86 scale and possible future developments of ‘vaccines’ to protect honey bees from viral disease  
87 [36].

## 88 **Materials and Methods**

### 89 RG DWV clones preparation

90 VDD, VVD and VVV RG constructs used in this study were described earlier [25], DDD

91 RG cDNA was prepared by modification of the VDD RG system with DWV type A parental  
92 sequence insert, which was based on published data [37] and obtained by custom gene  
93 synthesis (IDT, Leuven, Belgium). EGFP and mCherry-expressing chimeric DWV genomes  
94 were built via incorporation of the reporter-encoding sequence into DWV cDNA as described  
95 previously [25]. All plasmid sequences were verified by Sanger sequencing. cDNA sequences of  
96 DDD and VVV<sub>mc</sub> are shown in Text S1, other RG cDNAs are available online (GenBank  
97 accession numbers: DWV-VDD - MT415949, DWV-VVD - MT415950, DWV-VVV - MT415952,  
98 DWV-VDD-eGFP - MT415948, DWV-VVD-eGFP - MT415953).

#### 99 Viral RNA and siRNA synthesis

100 DWV RNA was synthesized from linearized plasmid templates with T7 RiboMAX  
101 Express Large Scale RNA Production System (Promega, Southampton, UK), and purified with  
102 GeneJet RNA Purification Kit (Thermo Fisher Scientific) as described in [25].

103 siRNA strands were prepared using Express Large Scale RNA Production System  
104 (Promega) according to the manufacturer's protocol with double stranded DNA templates  
105 annealed from synthetic oligonucleotide pairs containing T7 RNA polymerase promoter  
106 sequence (Table S1).

#### 107 Viruses

108 Infectious DWV was prepared from honey bee pupae injected with *in vitro* generated  
109 RNA as previously described [25, 38]. For quantification RNA was extracted from 100 µl of virus  
110 preparation using RNeasy kit (Qiagen, Manchester, UK) and analysed by reverse transcription  
111 and quantitative PCR (qPCR).

#### 112 Honey bees and bumble bees

113 All honey bee (*Apis mellifera*) brood in this study was obtained from the University of St  
114 Andrews research apiary. Colonies were managed to reduce *Varroa* levels and endogenous  
115 DWV levels were regularly tested. Honey bee larvae and both honey and bumble bee pupae  
116 (*Bombus terrestris audax*, Biobest, Belgium) were maintained and fed as described previously

117 [25].

#### 118 Virus inoculations

119 Virus injections of pupae were performed with insulin syringes (BD Micro Fine Plus, 1 ml,  
120 30 G, Becton Dickinson, Oxford, UK) as described in [25, 38].

121 Oral larval infection was carried out by single DWV feeding according to the previously  
122 described procedure [25]

#### 123 RNA extraction, reverse transcription and PCR (RT-PCR)

124 RT-PCR and qPCR analysis of individual pupae samples was performed as previously  
125 described [25]. Sequences of primers are shown in Table S1. When required, PCR products  
126 were subjected to restriction digest prior to loading on the 1% agarose gel stained with ethidium  
127 bromide. DWV titres were calculated by relating the resulting Ct value to the standard curve  
128 generated from a serial dilution of the cDNA obtained from the viral RNA used for virus stock  
129 preparation.

#### 130 Microscopy

131 Imaging was conducted using a Leica TCS SP8 confocal microscope with 10× HC PL  
132 FLUOTAR objective. For dissected pupae analysis samples were mounted in a drop of PBS  
133 under the microscope cover slides and observed by microscopy within 1 h after the dissection.

#### 134 Sample libraries for next generation sequencing

135 RNA was reverse transcribed using Superscript III polymerase (Invitrogen, Thermo  
136 Fisher Scientific) with DWV FG RP1 primer (Table S1) using 1 µg of total RNA in a 20 µl final  
137 reaction volume and following the manufacturer's protocol. Reactions were incubated at 50°C  
138 for 1 h, 75°C for 15 min.

139 The transcribed cDNA was amplified using LongAmp Taq polymerase (New England  
140 Biolabs) to produce a ~10 Kb PCR fragment. The reactions were carried out according to the  
141 manufacturer's protocol with the following thermal profile: 30 s at 95°C, 30 cycles of 95°C for 15  
142 s, 53°C for 30 s and 65°C for 8 min, with a final extension at 65°C for 10 min.

143 Recombination Analysis

144 Purified amplicons were sequenced using an Illumina Hi-seq at the University of St  
145 Andrews, producing 2x300 bp paired-end reads. The sequences were converted to Fasta  
146 format, extracted and trimmed using Geneious (v.2019.1.3). A reference genome file was made  
147 using VVV and VDD cDNA sequences with a terminal pad of A-tails added to maximise  
148 sensitivity [39]. The reference file was indexed using Bowtie Build (Version 0.12.9) and the  
149 Illumina reads were mapped to the reference file using the recombinant-mapping algorithm,  
150 ViReMa (Viral-Recombination Mapper, Version 0.15). The recombinant sequences were  
151 compiled as a text file and analysed using ggpubr (v2.3) in R Studio.

152 **Results**

153 Modular RG system design for DWV

154 To compare the virulence and competitiveness of DWV types and their recombinants a  
155 set of cDNA clones were prepared. By exploiting the modular organisation of the DWV genome  
156 [21] we have previously constructed infectious cDNAs for several distinct genetic variants of  
157 DWV [25]. For convenience these are referred to as follows: VDD (DWV type A coding  
158 sequence, GenBank MT415949), VVD (a type B/A recombinant, GenBank MT415950) and VVV  
159 (DWV type B, GenBank MT415952). In addition we constructed a cDNA for a complete type A  
160 DWV, designated DDD, using a similar gene synthesis and module replacement strategy [25] to  
161 incorporate the DWV type A 5'-untranslated region (5'-UTR; DWV-A 1414, GenBank KU847397  
162 used as a reference - Figure S1). VDD, VVV and VVD DWV variants were previously shown to  
163 be infectious and cause symptomatic disease in honey bees [25]. Infectivity of the DDD virus  
164 was verified by analysis of DWV accumulation in injected pupae and was indistinguishable from  
165 the VDD virus (Figure S2a). Derivatives of VDD, VVD and VVV, expressing the enhanced green  
166 fluorescent protein (EGFP) or mCherry, were generated as previously described [25] (Figure  
167 S1) and their replication verified following inoculation of pupae (for example, Figure S2b).

168 Superinfection and coinfection studies

169 *Varroa* delivers DWV to developing honey bee pupae by direct injection when feeding.  
170 Pupae will already contain previously acquired DWV and the mite may contain one or more  
171 DWV variants. We investigated the consequences of coinfection and superinfection on  
172 accumulation of distinct DWV variants in honey bee pupae under laboratory conditions. Primary  
173 infection was achieved by feeding first instar larvae (0-1 day old) with a diet containing  $10^7$   
174 genome equivalents (GE) of either VDD or VVV DWV, followed by secondary inoculation by  
175 injection ( $10^3$  GE) with the reciprocal virus variant ten days later at the white-eyed pupal stage.  
176 The viral load in individual pupae was analysed by qPCR 24 h post-injection using DWV type-  
177 specific primers for the RNA-dependent RNA polymerase (RdRp) coding region. Pupae infected  
178 by larval feeding showed a markedly reduced accumulation of the injected DWV variant when  
179 compared to the same virus in pupae which were not fed DWV as larvae (Figure 1a).

180 Reduced accumulation of a superinfecting virus was also observed when white-eyed  
181 pupae were initially injected with VDD or VVV 24 h prior to introduction of the reciprocal virus  
182 variant (first injection -  $10^2$  GE, superinfection -  $10^6$  GE, Figure 1b). In contrast, simultaneous  
183 infection with two or three (VDD, VVV and VVD) DWV variants ( $10^2$  GE in total virus injected  
184 corresponding to  $0.5 \times 10^2$  or  $0.33 \times 10^2$  GE of each variant for two- and three-component  
185 infections respectively) resulted in nearly equivalent virus loads, although the VDD variant  
186 accumulated to slightly lower ( $\sim 0.5 \log_{10}$ ) titres at 24 h post-injection.

#### 187 Dynamics of DWV accumulation in superinfection conditions

188 We extended these studies to determine whether the apparent competitive disadvantage  
189 for the second virus remained after an extended incubation period. Pupal injections were  
190 repeated as before and viral loads quantified 5 and 7 days after superinfection. A recombinant  
191 type B/A variant (VVD) was additionally included both as primary and superinfecting virus. In  
192 reciprocal infections using VDD and VVV both the initial and the superinfecting virus reached  
193 nearly equivalent levels within the incubation period (Figure 2). In contrast, in virus pairings with  
194 a greater sequence identity between the genomes the superinfecting virus exhibited a reduced



195 accumulation even after prolonged incubation. In the “VDD→VVD”, “VVD→VDD” and  
196 “VVD→VVV” groups the superinfecting virus levels were  $\sim 2 \log_{10}$  lower than the initial inoculum  
197 at 5-7 days post-injection. For the “VVV→VVD” pairing this was more marked, with the  
198 superinfecting virus still  $\sim 4 \log_{10}$  lower after 7 days. In control pupae infected with VDD, VVD or  
199 VVV individually all three viruses reached high titres 7 days post-injection (Figure 2 and Figure  
200 S3). Additionally, virus accumulation was monitored after coinfection of equal amounts of each  
201 combination of VDD, VVD and VVV over time. In these studies, all coinfecting variants achieved  
202 similar titres 5 days post-inoculation (Figure S3).

203 We recently demonstrated that bumble bees are susceptible to DWV infection when  
204 directly injected at high doses [38]. We therefore investigated the influence of the host  
205 environment on the DWV superinfection by conducting similar experiments in bumble bee  
206 pupae. At 48 h post superinfection the levels of the second virus administered were lower than  
207 that of the primary virus inoculated but – with the exception of the “VVD→VVV” combination –  
208 had achieved similar levels by 6 days post-injection (Figure S4).

209 These results suggest that a superinfecting virus experiences an initial competitive  
210 disadvantage, but that this disadvantage is overcome after 5 to 7 days unless the viruses exhibit  
211 more extensive sequence identity. To investigate this further we studied superinfection with  
212 essentially identical viruses, using two VVD variants distinguishable solely by unique genetic  
213 tags – VVD<sub>S</sub> and VVD<sub>H</sub>, tagged with a *Sall* or *HpaI* restriction site respectively (Figure S1) –  
214 which differ by just 4 nucleotides. Honey bee pupae injected with VVD<sub>H</sub> were challenged 24 h  
215 later with VVD<sub>S</sub> and analysed by end point PCR and restriction assay 1, 3 and 6 days after  
216 superinfection. No VVD<sub>S</sub> was detectable in superinfected pupae at any time point analysed  
217 (Figure S5) suggesting a complete or near-complete block of the superinfecting genome  
218 amplification. Control injections of VVD<sub>S</sub> into pupae, which did not receive VVD<sub>H</sub> virus, allowed  
219 detection of *Sall*-tagged cDNA 24 h post-inoculation.

220 Tissue localisation studies using reporter-encoding DWV

221 Total RNA levels analysis allows the quantification of DWV to be determined, but it  
222 obscures details of the relative distribution and tissue tropism of individual virus variants.  
223 Previously we developed an EGFP-encoding RG system for DWV [25] based upon the VDD  
224 genome and designated DWV<sub>E</sub> (for convenience here renamed to VDD<sub>E</sub>). We used VDD<sub>E</sub> to  
225 define whether the primary infection also affects the distribution of the superinfecting virus.  
226 Furthermore, we constructed a full length DWV type A genome, designated DDD (Figure S1),  
227 and similarly investigated superinfection of DDD infected pupae. Pupae that had received an  
228 initial injection of 10<sup>2</sup> GE of DDD, VDD, VVD or VVV were inoculated 24 h later with 10<sup>6</sup> GE of  
229 VDD<sub>E</sub>. Live pupae were analysed by confocal microscopy for the presence of the EGFP signal  
230 (Figure 3). Three regions of each pupa were visualized - the head, the developing wing and the  
231 abdomen - as we have previously demonstrated significant virus accumulation in these  
232 locations [25].

233 Injection of VDD<sub>E</sub> in the absence of a primary infection (“Mock→VDD<sub>E</sub>” group) resulted in  
234 efficient expression of EGFP throughout the pupa 24 h post-inoculation (Figure 3a-c). In the  
235 case of superinfection, the EGFP signal could be seen 24 h later only in pupae where VVV was  
236 used as a primary infecting genotype (Figure 3h and i). In these pupae, the number of  
237 fluorescent foci was lower when compared to the “Mock→VDD<sub>E</sub>” group infected for the same 24  
238 h period (Figure 3, panels a-c vs. g-i in). No EGFP signal was visible upon superinfection with  
239 VDD<sub>E</sub> after 24 h in pupae first injected with VVD, VDD and DDD (data not shown). At 4-5 days  
240 post-inoculation with VDD<sub>E</sub> there were also differences observed in the levels and distribution of  
241 the reporter protein. For example, no EGFP signal was found in the wings after primary  
242 inoculation with VVD or DDD (Figure 3, panels n and t vs. e and k). Visible EGFP expression  
243 was detected in the head and abdomen in the pupae from these injection groups after 4-5 days  
244 but the extent and number of fluorescent foci was reduced when compared to the  
245 “Mock→VDD<sub>E</sub>” and “VVV→VDD<sub>E</sub>” pupae (Figure 3, panels m, o, s and u vs. panels d, f, j and l).

246 In contrast to the “Mock→VDD<sub>E</sub>” and “VVV→VDD<sub>E</sub>” samples, only a fraction of pupae in  
247 “VVD→VDD<sub>E</sub>” and “DDD→VVD<sub>E</sub>” groups exhibited detectable EGFP signal in each of the body  
248 sites under analysis (Table S2). Finally, pupae initially injected with VDD did not show any  
249 detectable EGFP signal even 6 days after superinfection with VDD<sub>E</sub> (Figure 3p-r, Figure S6),  
250 suggesting again that greater sequence identity restricts the activity of the superinfecting virus.

251 To confirm that the external analysis of the intact living pupae was representative,  
252 selected samples were dissected. Tissue samples, including parts of the digestive tract, wing  
253 rudiments, thoracal muscle tissue, brain, and cephalic glands were visualised by confocal  
254 microscope (Figure S6). This analysis recapitulated the pattern of fluorescence observed by  
255 previous visualisation of intact pupae. To complement the microscopy data we quantified DWV  
256 RNA in selected pupae by qPCR at 24 h and 5 days post superinfection (Figure S7) and found  
257 that there was a good agreement between the amount of genomic RNA and the level of  
258 detectable fluorescence.

#### 259 Localisation of DWV in coinfecting and superinfected pupae using two-colour microscopy

260 In order to visualize the distribution of infection with different DWV variants we used  
261 EGFP- and mCherry-expressing viruses, VDD<sub>E</sub>, VVD<sub>E</sub> and VVV<sub>mC</sub> (with subscript E and mC  
262 indicating the EGFP or mCherry reporter respectively, Figure S1). For coinfection, pupae were  
263 injected with equimolar mixtures of VVD<sub>E</sub> or VDD<sub>E</sub> and VVV<sub>mC</sub> and analysed under the confocal  
264 microscope 1 to 5 days post-inoculation. We could readily detect red and green fluorescent  
265 signals present in the same tissues of virus-injected pupae as previously described [25],  
266 including multiple tissues of the digestive tract, wings and head tissues. The reporter gene  
267 expression sites appeared as individual punctate foci of either red or green fluorescence, with  
268 only a few displaying dual fluorescence for both reporters (Figure 4a and Figure S8). The  
269 analysis of VDD<sub>E</sub>-infected pupae superinfected with VVV<sub>mC</sub> and visualised by microscopy after  
270 a further 24 h revealed a similar distribution of the fluorescent signal as in coinfecting samples  
271 (Figure 4b).

## 272 Recombination between VDD and VVV DWV

273 The interpretation of the superinfection studies is based upon sequence-specific  
274 quantification of particular regions of the virus genome by qPCR. This interpretation could be  
275 confounded by extensive levels of genetic recombination, a natural consequence of coinfection  
276 with related viruses [40]. Genetic recombination of RNA viruses requires that both parental  
277 genomes are present within an individual cell [41]. Since our microscopy analysis had detected  
278 only limited numbers of apparently dually infected foci during mixed infections we conducted  
279 further analysis to investigate the presence and identity of viral recombinants, and the influence  
280 of the order of virus acquisition on recombination, using next generation sequencing. Illumina  
281 paired-reads were generated from PCR amplicons of a 10 Kb fragment of the DWV genome  
282 targeting pupae initially infected with VDD and challenged with VVV, or vice versa (samples  
283 “VVV→VDD” and “VDD→VVV” at 5 or 7 days after superinfection). Recombination junctions  
284 were detected across the entirety of the DWV genome in all samples analysed with ‘hotspots’ of  
285 recombination denoted by an increased number of aligned reads identified at numerous points  
286 in the genome (Figure 5b, Table S3), including some previously reported [21]. The percentage  
287 of reads corresponding to recombination junctions varied in individual pupae from 1-2.2% of all  
288 mapped reads (Figure S9). In all cases approximately equal proportions of recombinants were  
289 detected with VVV or VDD as the 5'-acceptor partner (terminology assumes that recombination  
290 occurs during negative strand synthesis [40, 42]). In several instances we detected the same  
291 recombination junction with both VVV and VDD as the 5'-acceptor. Our analysis also revealed  
292 recombination sites in which the 5' was only ever derived from one variant or the other (red and  
293 blue points in Figure 5b, Table S3). These results demonstrate that although superinfecting  
294 virus recombines readily with an established variant, the recombinant population remains a  
295 minor component of the total virus population, and is well below the level expected to confound  
296 our analysis of competition between extant and superinfecting viruses.

## 297 **Discussion**

298           The global distribution and ubiquitous nature of DWV [14, 19], transmitted vertically and  
299 horizontally in honey bees [15, 43, 44], inevitably means that when vectored by *Varroa* it is  
300 introduced to the host as a superinfecting virus. As such, there is the potential for competition  
301 for cellular resources in coinfecting tissues, or the possibility of a pre-existing infection retarding  
302 or inhibiting superinfection through molecular mechanisms including SIE or the immune  
303 responses induced by the initial virus. There are at least two distinct types of DWV circulating  
304 globally – type A and type B – with documented differences in their distribution [8, 18, 22] and,  
305 perhaps, pathogenesis [13, 19, 23, 25]. If the outcome of superinfection always favoured one  
306 virus type it would influence transmission of DWV variants potentially accounting for their  
307 geographic distribution and – if associated with differences in virulence – the impact on the  
308 honey bees.

309           SIE has been reported for DWV, with the suggestion that bees bearing a type B virus  
310 were protected from subsequent type A transmitted from infesting *Varroa* mites [10]. SIE is  
311 described for several human, animal and plant viruses [26–35], and may operate via a number  
312 of molecular mechanisms [26, 27, 30, 31, 45–48]. Precedents already exist in plants with milder  
313 forms of a virus providing protection against more virulent strains [49, 50] and the recent spread  
314 of DWV type B in the USA [8, 22] could be interpreted as an indirect consequence of SIE, with  
315 bees harbouring this virus less susceptible to infection by DWV type A. However, there are  
316 other potential differences between DWV types such as the ability of variants with type B capsid  
317 to replicate in *Varroa* [25, 51], which may enhance its spread over the non-propagative  
318 transmission reported for type A [52].

319           The availability of RG system allowed us to investigate the consequences of coinfection  
320 and superinfection with DWV type A and B in individual honey bees. We found that when  
321 coinfecting DWV type A and B (VDD and VVV variants) demonstrate broadly similar levels of  
322 replication (Figure 1b). In contrast, in sequential infections, either of virus-fed larvae or injected  
323 pupae, superinfecting DWV variant showed delayed replication (Figure 1). This delay was

324 dependent upon the genetic similarity of the primary and secondary viruses and appeared  
325 transient in certain pairings. In genetically divergent pairings (e.g. “VDD→VVV” and  
326 “VVV→VDD”) high levels of both viruses were reached after a prolonged incubation period. In  
327 contrast, where the extent of genetic identity between the primary and secondary virus was  
328 greater, the superinfecting virus failed to ‘catch up’, even after 7 days (Figure 2). This was most  
329 dramatically demonstrated using two genomes that differed by just 4 nucleotides (VVD<sub>S</sub> and  
330 VVD<sub>H</sub> variants), in which case the superinfecting virus remained undetectable after 6 days  
331 incubation (Figure S5). In addition, we found that delayed accumulation of the genetically similar  
332 superinfecting DWV variants is not specific to honey bee host and was also observed in bumble  
333 bees, a species susceptible to DWV infection when directly injected (Figure S4, [38]).

334 We extended our analysis in honey bee pupae using reporter gene-expressing viruses  
335 and demonstrated that replication, characterized by the expression of the fluorescent protein,  
336 was inversely related to the level of genetic identity between the primary and superinfecting  
337 viruses (Figure 4). For example, VDD<sub>E</sub> replicated extensively, albeit somewhat delayed when  
338 compared with VDD<sub>E</sub>-only infected pupae, in pupae that had received VVV as the primary virus  
339 (Figure 4j-l), but was undetectable in pupae initially inoculated with VDD (Figure 4p-s). Notably,  
340 in each case where the superinfecting virus showed reduced replication after extended  
341 incubation, dominance in the replication showed no directionality according to virus type and  
342 was due solely to the order of addition. Based on this data it is likely that sequential infection  
343 with DWV type A and B will result in both viruses replicating to maximal levels before eclosion of  
344 either worker or drone brood pupae (which pupate for ~12 or ~14 days respectively). It remains  
345 to be determined whether the delay we demonstrate is sufficient to influence the colony-level  
346 virus population, or that carried and transmitted by *Varroa*.

347 Where cellular coinfection occurs viruses have the opportunity to genetically recombine.  
348 This is a widespread phenomenon in the single-stranded positive-sense RNA viruses [53, 54]  
349 and has previously been documented in DWV [6–9]. Our microscopy analysis of honey bee

350 pupae infected with two reporter-expressing DWV variants predominantly demonstrated non-  
351 colocalised expression of the fluorescent signal. However, small numbers of dual-infection foci  
352 were detected, directly implying that the opportunity for recombination exists (Figure 4c and  
353 Figure S8). Using next generation sequencing we confirmed the formation of recombinants and  
354 characterised the recombination products by analysis of the viral RNA in pupae reciprocally  
355 superinfected with VDD and VVV. 1-2.2% of mapped reads spanned recombination junctions,  
356 with no evidence for any bias in their directionality (VDD/VVV or VVV/VDD; Figure S9).  
357 Although these junctions mapped throughout the DWV genome, the greatest number were  
358 concentrated in the region of the genome encoding the junction of the structural and non-  
359 structural proteins (Figure 5a). This observation matches that found for other picornaviruses and  
360 reflects the mix'n'match modular nature of the *Picornavirales* genome. In this, functional capsid-  
361 coding modules can, through recombination, be juxtaposed with non-structural coding modules  
362 from a different parental genome [55]. A small number of recombination junctions (~350 of  
363 35750 unique junctions mapped) plotted as outliers from the diagonal of genome-length  
364 recombinants. Analysis of these sequences showed that the majority were out of frame  
365 deletions (Woodford, unpublished), and so incapable of replicating. Our studies using analogous  
366 approaches in other RNA viruses show that these types of aberrant products are not unusual  
367 and reflect the random nature of the molecular mechanism of recombination ([42, 56]).

368         The competition we demonstrate in sequential DWV infections appears to be guided by  
369 the amount of genetic identity between the viruses. This suggests it is most likely mediated via  
370 RNA interference (RNAi). In arthropods antiviral RNAi response acts via generation of short  
371 double stranded RNAs (siRNA) from virus RNA replication intermediates through cleavage by  
372 the enzyme Dicer. These are further used by the RNA induced silencing complex (RISC) to  
373 target the destruction of complementary sequences [55, 56]. Hence viral RNA genomes  
374 exhibiting greater identity are likely to generate higher numbers of cross-reactive siRNAs.  
375 Previous analysis of the RNAi population in DWV infected honey bees demonstrated that 75%

376 of DWV-specific short RNA are 21/22 mers [21]. Although DWV type A and B exhibit ~85%  
377 genetic identity it is not contiguous (Figure S1), but is instead distributed in ~1350 short regions  
378 of 1-389 nucleotides. Of these, less than 4% by number are of 21 nucleotides or greater in  
379 length, and therefore capable of generating perfectly complementary siRNAs. Recalculation of  
380 the identity between genomes having excluded sequences under 21 nt in extent demonstrates  
381 that there is only 34% genetic identity between DDD and VVV (Table S4). Comparing the  
382 figures from this analysis and the quantification of DWV accumulation in superinfected pupae  
383 suggests a clear relationship between the extent of the competition observed and the genetic  
384 identity of contiguous sequences. It is already known that exogenous RNAi can control DWV  
385 and other RNA viruses [57–59], and in our preliminary studies we have shown that RNAi-  
386 mediated suppression of Dicer leads to both increased pathogenesis and viral loads in DWV-  
387 infected bees (Figure S10). Further research will be required to determine the role of RNAi in  
388 competition between superinfecting DWV variants and its potential exploitation in studies to  
389 develop cross-reactive vaccines against DWV [36]. These future studies will need to take  
390 account of the disrupted complementarity between the genomes (Table S4), the uneven  
391 distribution of mapped RNAi's to the genome [21] and both the variation acceptable within the  
392 RNAi seed sequence and the RNA structure of the target.

### 393 **Acknowledgements**

394 We express our gratitude to Dr Marcus Bischoff and Gill McVee (University of St  
395 Andrews) for helping with microscopic imaging, Ashley Pearson (University of St Andrews) for  
396 assistance in molecular biology assays.

397 This work was supported by grant funding from BBSRC BB/M00337X/2 and  
398 BB/I000828/1.

### 399 **Competing Interests**

400 Authors declare no competing financial interests in relation to the work described.

### 401 **References**



- 402 1. Honey: market value worldwide 2007-2016.  
403 <https://www.statista.com/statistics/933928/global-market-value-of-honey/>. Accessed 25 Nov  
404 2020.
- 405 2. Highfield AC, El Nagar A, Mackinder LCM, Noël LM-LJ, Hall MJ, Martin SJ, et al. Deformed  
406 wing virus implicated in overwintering honeybee colony losses. *Appl Environ Microbiol*  
407 2009; 75: 7212–7220.
- 408 3. Ongus JR, Peters D, Bonmatin JM, Bengsch E, Vlak JM, van Oers MM. Complete  
409 sequence of a picorna-like virus of the genus Iflavirus replicating in the mite *Varroa*  
410 destructor. *J Gen Virol* 2004; 85: 3747–3755.
- 411 4. Lanzi G, Miranda JRD, Boniotti MB, Cameron CE, Lavazza A, Capucci L, et al. Molecular  
412 and Biological Characterization of Deformed Wing Virus of Honeybees (*Apis mellifera* L.).  
413 *Society* 2006; 80: 4998–5009.
- 414 5. Fujiyuki T, Takeuchi H, Ono M, Ohka S, Sasaki T, Nomoto A, et al. Kakugo Virus from  
415 Brains of Aggressive Worker Honeybees. *Adv Virus Res* 2005; 65: 1–27.
- 416 6. Dalmon A, Desbiez C, Coulon M, Thomasson M, Le Conte Y, Alaux C, et al. Evidence for  
417 positive selection and recombination hotspots in Deformed wing virus (DWV). *Sci Rep*  
418 2017; 7: 41045; doi:10.1038/srep41045.
- 419 7. Zioni N, Soroker V, Chejanovsky N. Replication of *Varroa* destructor virus 1 (VDV-1) and a  
420 *Varroa* destructor virus 1–deformed wing virus recombinant (VDV-1–DWV) in the head of  
421 the honey bee. *Virology* 2011; 417: 106–112.
- 422 8. Ryabov EV, Childers AK, Chen Y, Madella S, Nessa A, Vanengelsdorp D, et al. Recent  
423 spread of *Varroa* destructor virus - 1, a honey bee pathogen, in the United States. *Sci Rep*;  
424 7: 17447; doi:10.1038/s41598-017-17802-3.
- 425 9. Moore J, Jironkin A, Chandler D, Burroughs N, Evans DJ, Ryabov EV. Recombinants  
426 between Deformed wing virus and *Varroa* destructor virus-1 may prevail in *Varroa*  
427 destructor-infested honeybee colonies. *J Gen Virol* 2011; 92: 156–161.

- 428 10. Mordecai GJ, Brettell LE, Martin SJ, Dixon D, Jones IM, Schroeder DC. Superinfection  
429 exclusion and the long-term survival of honey bees in Varroa-infested colonies. *ISME J*  
430 2015; 10: 1182–1191.
- 431 11. Woodford L, Evans DJ. Deformed wing virus: using reverse genetics to tackle unanswered  
432 questions about the most important viral pathogen of honey bees. *FEMS Microbiol Rev*  
433 2020; fuaa070; doi:10.1093/femsre/fuaa070.
- 434 12. Mordecai GJ, Wilfert L, Martin SJ, Jones IM, Schroeder DC. Diversity in a honey bee  
435 pathogen: first report of a third master variant of the Deformed Wing Virus quasispecies.  
436 *ISME J* 2016; 10: 1264–1273.
- 437 13. McMahon DP, Natsopoulou ME, Doublet V, Fürst M, Weging S, Brown MJF, et al. Elevated  
438 virulence of an emerging viral genotype as a driver of honeybee loss. *Proc Biol Sci* 2016;  
439 283: 443–449.
- 440 14. Wilfert L, Long G, Leggett HC, Schmid-Hempel P, Butlin R, Martin SJM, et al. Deformed  
441 wing virus is a recent global epidemic in honeybees driven by Varroa mites. *Science* 2016;  
442 351: 594–597.
- 443 15. Miranda JR de, de Miranda JR, Genersch E. Deformed wing virus. *Journal of Invertebrate*  
444 *Pathology* 2010; 103: S48–S61.
- 445 16. Roberts JMK, Anderson DL, Durr PA. Absence of deformed wing virus and Varroa  
446 destructor in Australia provides unique perspectives on honeybee viral landscapes and  
447 colony losses. *Sci Rep* 2017; 7: 6925; doi:10.1038/s41598-017-07290-w.
- 448 17. Yue C, Schröder M, Gisder S, Genersch E. Vertical-transmission routes for deformed wing  
449 virus of honeybees (*Apis mellifera*). *J Gen Virol* 2007; 88: 2329–2336.
- 450 18. Ryabov EV, Childers AK, Lopez D, Grubbs K, Posada-Florez F, Weaver D, et al. Dynamic  
451 evolution in the key honey bee pathogen deformed wing virus: Novel insights into virulence  
452 and competition using reverse genetics. *PLoS Biol* 2019; 17(10);  
453 doi:10.1371/journal.pbio.3000502.

- 454 19. Martin SJ, Highfield AC, Brettell L, Villalobos EM, Budge GE, Powell M, et al. Global Honey  
455 Bee Viral Landscape Altered by a Parasitic Mite. *Science* 2012; 336: 1304–1306.
- 456 20. Loope KJ, Baty JW, Lester PJ, Wilson Rankin EE. Pathogen shifts in a honeybee predator  
457 following the arrival of the Varroa mite. *Proceedings of the Royal Society B: Biological*  
458 *Sciences* 2019; 286: 20182499; doi:10.1098/rspb.2018.2499.
- 459 21. Ryabov EV, Wood GR, Fannon JM, Moore JD, Bull JC, Chandler D, et al. A Virulent Strain  
460 of Deformed Wing Virus (DWV) of Honeybees (*Apis mellifera*) Prevails after Varroa  
461 destructor-Mediated, or In Vitro, Transmission. *PLoS Pathog* 2014; 10(6): e1004230;  
462 doi:10.1371/journal.ppat.1004230.
- 463 22. Kevill JL, de Souza FS, Sharples C, Oliver R, Schroeder DC, Martin SJ. DWV-A Lethal to  
464 Honey Bees (*Apis mellifera*): A Colony Level Survey of DWV Variants (A, B, and C) in  
465 England, Wales, and 32 States across the US. *Viruses* 2019; 11(5): 426;  
466 doi:10.3390/v11050426.
- 467 23. Tehel A, Vu Q, Bigot D, Gogol-Döring A, Koch P, Jenkins C, et al. The Two Prevalent  
468 Genotypes of an Emerging Infectious Disease, *Deformed Wing Virus*, Cause Equally Low  
469 Pupal Mortality and Equally High Wing Deformities in Host Honey Bees. *Viruses* 2019;  
470 11(2), 114; doi:10.3390/v11020114.
- 471 24. Norton AM, Remnant EJ, Buchmann G, Beekman M. Accumulation and Competition  
472 Amongst Deformed Wing Virus Genotypes in Naïve Australian Honeybees Provides Insight  
473 Into the Increasing Global Prevalence of Genotype B. *Front Microbiol* 2020; 11: 620;  
474 doi:10.3389/fmicb.2020.00620.
- 475 25. Gusachenko ON, Woodford L, Balbirnie-Cumming K, Campbell EM, Christie CR, Bowman  
476 AS, et al. Green Bees: Reverse Genetic Analysis of Deformed Wing Virus Transmission,  
477 Replication, and Tropism. *Viruses* 2020; 12(5): 532; doi:10.3390/v12050532.
- 478 26. Steck FT, Rubin H. The mechanism of interference between an avian leukosis virus and  
479 Rous sarcoma virus. II. Early steps of infection by RSV of cells under conditions of

- 480 interference. *Virology* 1966; 29: 642–653.
- 481 27. Adams RH, Brown DT. BHK cells expressing Sindbis virus-induced homologous  
482 interference allow the translation of nonstructural genes of superinfecting virus. *J Virol*  
483 1985; 54: 351–357.
- 484 28. The alphaviruses: gene expression, replication, and evolution. *Microbiol Rev* 1994; 58: 806.
- 485 29. Karpf AR, Lenches E, Strauss EG, Strauss JH, Brown DT. Superinfection exclusion of  
486 alphaviruses in three mosquito cell lines persistently infected with Sindbis virus. *J Virol*  
487 1997; 71: 7119–7123.
- 488 30. Singh IR, Suomalainen M, Varadarajan S, Garoff H, Helenius A. Multiple mechanisms for  
489 the inhibition of entry and uncoating of superinfecting Semliki Forest virus. *Virology* 1997;  
490 231: 59–71.
- 491 31. Geib T, Sauder C, Venturelli S, Hässler C, Staeheli P, Schwemmler M. Selective virus  
492 resistance conferred by expression of Borna disease virus nucleocapsid components. *J*  
493 *Virol* 2003; 77: 4283–4290.
- 494 32. Edwards MC, Bragg J, Jackson AO. Natural Resistance Mechanisms to Viruses in Barley.  
495 In: Loebenstein G and Carr JP (eds). *Natural Resistance Mechanisms of Plants to Viruses*,  
496 Springer: Dordrecht, The Netherlands, 2006, pp 465–501.
- 497 33. Bergua M, Zwart MP, El-Mohtar C, Shilts T, Elena SF, Folimonova SY. A Viral Protein  
498 Mediates Superinfection Exclusion at the Whole-Organism Level but Is Not Required for  
499 Exclusion at the Cellular Level. *Journal of Virology* 2014; 88: 11327–11338.
- 500 34. Michel N, Allespach I, Venzke S, Fackler OT, Keppler OT. The Nef protein of human  
501 immunodeficiency virus establishes superinfection immunity by a dual strategy to  
502 downregulate cell-surface CCR5 and CD4. *Curr Biol* 2005; 15: 714–723.
- 503 35. Tscherne DM, Evans MJ, von Hahn T, Jones CT, Stamatakis Z, McKeating JA, et al.  
504 Superinfection exclusion in cells infected with hepatitis C virus. *J Virol* 2007; 81: 3693–  
505 3703.

- 506 36. Leonard SP, Powell JE, Perutka J, Geng P, Heckmann LC, Horak RD, et al. Engineered  
507 symbionts activate honey bee immunity and limit pathogens. *Science* 2020; 367: 573–576.
- 508 37. Lamp B, Url A, Seitz K, Rgen Eichhorn J, Riedel C, Sinn LJ, et al. Construction and Rescue  
509 of a Molecular Clone of Deformed Wing Virus (DWV). 2016; 11: e0164639;  
510 doi:10.1371/journal.pone.0164639.
- 511 38. Gusachenko ON, Woodford L, Balbirnie-Cumming K, Ryabov EV, Evans DJ. Evidence for  
512 and against deformed wing virus spillover from honey bees to bumble bees: a reverse  
513 genetic analysis. *Sci Rep* 2020; 10: 16847; doi:10.1038/s41598-020-73809-3.
- 514 39. Routh A, Johnson JE. Discovery of functional genomic motifs in viruses with ViReMa-a  
515 Virus Recombination Mapper-for analysis of next-generation sequencing data. *Nucleic  
516 Acids Res* 2014; 42: e11; doi:10.1093/nar/gkt916.
- 517 40. Kirkegaard K, Baltimore D. The mechanism of RNA recombination in poliovirus. *Cell* 1986;  
518 47: 433–443.
- 519 41. Egger D, Bienz K. Recombination of poliovirus RNA proceeds in mixed replication  
520 complexes originating from distinct replication start sites. *J Virol* 2002; 76: 10960–10971.
- 521 42. Lowry K, Woodman A, Cook J, Evans DJ. Recombination in Enteroviruses Is a Biphasic  
522 Replicative Process Involving the Generation of Greater-than Genome Length ‘Imprecise’  
523 Intermediates. *PLoS Pathog* 2014; 10(6); doi:10.1371/journal.ppat.1004191.
- 524 43. de Miranda JR, Fries I. Venereal and vertical transmission of deformed wing virus in  
525 honeybees (*Apis mellifera* L.). *J Invertebr Pathol* 2008; 98: 184–189.
- 526 44. Yañez O, Jaffé R, Jarosch A, Fries I, Robin FAM, Robert JP, et al. Deformed wing virus  
527 and drone mating flights in the honey bee (*Apis mellifera*): Implications for sexual  
528 transmission of a major honey bee virus. *Apidologie* 2012; 43: 17–30.
- 529 45. Simon KO, Cardamone JJ Jr, Whitaker-Dowling PA, Youngner JS, Widnell CC. Cellular  
530 mechanisms in the superinfection exclusion of vesicular stomatitis virus. *Virology* 1990;  
531 177: 375–379.

- 532 46. Stevenson M, Meier C, Mann AM, Chapman N, Wasiaak A. Envelope glycoprotein of HIV  
533 induces interference and cytolysis resistance in CD4+ cells: mechanism for persistence in  
534 AIDS. *Cell* 1988; 53: 483–496.
- 535 47. Bratt MA, Rubin H. Specific interference among strains of Newcastle disease virus. II.  
536 Comparison of interference by active and inactive virus. *Virology* 1968; 35: 381–394.
- 537 48. Zou G, Zhang B, Lim P-Y, Yuan Z, Bernard KA, Shi P-Y. Exclusion of West Nile virus  
538 superinfection through RNA replication. *J Virol* 2009; 83: 11765–11776.
- 539 49. Ziebell H, Carr JP. Cross-protection: a century of mystery. *Adv Virus Res* 2010; 76: 211–  
540 264.
- 541 50. Folimonova SY. Developing an understanding of cross-protection by Citrus tristeza virus.  
542 *Front Microbiol* 2013; 4; doi:10.3389/fmicb.2013.00076.
- 543 51. Gisder S, Genersch E. Direct Evidence for Infection of Mites with the Bee-Pathogenic  
544 Deformed Wing Virus Variant B - but Not Variant A - via Fluorescence-Hybridization  
545 Analysis. *J Virol* 2020; e-pub ahead of print 9 December 2020; doi:10.1128/jvi.01786-20.
- 546 52. Posada-Florez F, Childers AK, Heerman MC, Egekwu NI, Cook SC, Chen Y, et al.  
547 Deformed wing virus type A, a major honey bee pathogen, is vectored by the mite *Varroa*  
548 destructor in a non-propagative manner. *Sci Rep* 2019; 9: 12445; doi: 10.1038/s41598-019-  
549 47447-3.
- 550 53. Barr JN, Fearn R. How RNA viruses maintain their genome integrity. *J Gen Virol* 2010; 91:  
551 1373–1387.
- 552 54. Bentley K, Evans DJ. Mechanisms and consequences of positive-strand RNA virus  
553 recombination. *J Gen Virol* 2018; 99: 1345–1356.
- 554 55. Muslin C, Mac Kain A, Bessaud M, Blondel B, Delpeyroux F. Recombination in  
555 Enteroviruses, a Multi-Step Modular Evolutionary Process. *Viruses* 2019; 11(9): 859; doi:  
556 10.3390/v11090859.
- 557 56. Alnaji FG, Bentley K, Pearson A, Woodman A, Moore JD, Fox H, et al. Recombination in

- 558 enteroviruses is a ubiquitous event independent of sequence homology and RNA structure  
559 2020; preprint at bioRxiv; doi:10.1101/2020.09.29.319285.
- 560 57. Desai SD, Eu YJ, Whyard S, Currie RW. Reduction in deformed wing virus infection in  
561 larval and adult honey bees (*Apis mellifera* L.) by double-stranded RNA ingestion. *Insect*  
562 *Mol Biol* 2012; 21: 446–455.
- 563 58. Hunter W, Ellis J, Vanengelsdorp D, Hayes J, Westervelt D, Glick E, et al. Large-scale field  
564 application of RNAi technology reducing Israeli acute paralysis virus disease in honey bees  
565 (*Apis mellifera*, hymenoptera: Apidae). *PLoS Pathog* 2010; 6(12): e1001160; doi:  
566 10.1371/journal.ppat.1001160.
- 567 59. Maori E, Paldi N, Shafir S, Kalev H, Tsur E, Glick E, et al. IAPV, a bee-affecting virus  
568 associated with colony collapse disorder can be silenced by dsRNA ingestion. *Insect Mol*  
569 *Biol* 2009; 18: 55–60.

## 570 **Figure legends**

571 **Figure 1. Coinfection and superinfection of honey bee brood with DWV. a.**  
572 Superinfection of honey bee pupae preliminarily infected *per os* at larval stage and then via  
573 injection at pupal stage. Quantified viral titres of VVV and VDD DWV in pupae 24 h post-  
574 injection of the superinfecting virus are shown (second virus inoculated by injection after primary  
575 infection by feeding with the reciprocal DWV variant is indicated by “→”, e.g. VVV (fed) → VDD  
576 (injected)). **b.** DWV accumulation in honey bee pupae in coinfecting (mixed virus population  
577 indicated by “+”) or superinfected samples (second injection 24 h after primary infection by  
578 injection is indicated by “→”). Primer pairs for type A or type B RdRp amplifying variant-specific  
579 fragments of virus polymerase encoding region were used to distinguish between the  
580 administered variants. Data points represent DWV levels in individual pupae with two points of  
581 different colour corresponding to different virus variants (red for type A RdRp and blue for type B  
582 RdRp respectively) in the same pupa (or in individual pupae for VVV or VDD only injected

583 samples). Error bars show mean  $\pm$ SD for each virus variant in each injection group, GE -  
584 genome equivalents. ANOVA:  $P < 0.05$  for type A accumulation in “Mock $\rightarrow$ VDD” vs “VVV $\rightarrow$ VDD”  
585 and for type B level in “Mock $\rightarrow$ VVV” vs “VDD $\rightarrow$ VVV” groups.

586 **Figure 2. qPCR analysis of DWV accumulation in superinfection conditions.** Honey  
587 bee pupae received a primary injection with one DWV variant (VVV, VDD or VVD) and a  
588 secondary injection (superinfection) with a different variant 24 h later. DWV accumulation was  
589 quantified 5 (grey shading) and 7 (no shading) days after the second injection. Primer sets  
590 specifically targeting the viral polymerase or a structural protein encoding region of DWV type A  
591 or type B were used to detect accumulation of each of the injected variants. Data points  
592 represent DWV levels in individual samples with two points of different colour corresponding to  
593 different virus variants (red for VDD, blue for VVV and purple for VVD respectively) in the same  
594 pupa (or in individual pupae for VVV, VDD or VVD only injected samples). Error bars show  
595 mean  $\pm$ SD for each virus variant in each injection group, GE - genome equivalents. ANOVA:  
596  $P < 0.05$  for “Mock $\rightarrow$ VDD” vs “VVD $\rightarrow$ VDD”, “Mock $\rightarrow$ VVD” vs “VDD $\rightarrow$ VVD”, “Mock $\rightarrow$ VVD” vs  
597 “VVV $\rightarrow$ VVD”, “Mock $\rightarrow$ VVV” vs “VVD $\rightarrow$ VVV” at 7 days time point.

598 **Figure 3. EGFP signal localisation in VDD<sub>E</sub> injected honey bee pupae analysed by**  
599 **confocal microscopy.** Combined white-field and fluorescent images are shown for  
600 convenience of interpretation. Pupae were analysed 1 and 4-5 days after the second injection.  
601 For VVD, VDD and DDD primary infection groups only samples incubated for 4-5 days are  
602 shown, as no EGFP was detected after 1 day. Scale bars correspond to 500  $\mu$ m.

603 **Figure 4. Confocal microscopy analysis of honey bee pupae coinfecting or**  
604 **superinfected with DWV variants encoding EGFP and mCherry. a.** Coinfection: “VDD<sub>E</sub> +  
605 VVV<sub>mC</sub>” or “VVD<sub>E</sub> + VVV<sub>mC</sub>” panels show red (mCherry) and green (EGFP) fluorescence signals  
606 detected in the abdomen of intact pupae (upper row) or in the dissected tissues of the digestive  
607 tract (rectum tissue shown as an example). Scale bars correspond to 500  $\mu$ m. **b.** Superinfection:  
608 upper panel – abdomen of an intact pupa initially infected with VDD<sub>E</sub> and superinfected 24 h



609 later with VVV<sub>mC</sub> analysed 24 h after the second injection; lower panel – abdomen of an intact  
610 pupa injected with VVV<sub>mC</sub> only and analysed 24 h post-inoculation. Scale bars correspond to  
611 500  $\mu$ m c. Magnified image of highlighted region (from panel a) of pupa coinfecting with VDD<sub>E</sub> +  
612 VVV<sub>mC</sub>. Individual images for EGFP and mCherry signals, and a combined image for both  
613 fluorophores are shown. Arrows indicate individual foci of infection exhibiting both EGFP and  
614 mCherry expression. Scale bars correspond to 100  $\mu$ m.

615 **Figure 5. Genomic recombination events observed between VVV and VDD DWV**  
616 **variants in a superinfected honey bee pupa. a.** Mapped recombination events in a honey bee  
617 pupa initially infected with VVV and superinfected with VDD DWV. The plot shows  
618 recombination events occurring along the full length of the DWV genome, with the VDD genome  
619 length shown on the Y-axis and VVV shown on the X-axis. Each bubble represents a unique  
620 recombination site and bubble size is determined by the number of mapped and aligned reads  
621 for this site obtained using ViReMa analysis. The colour of the bubble indicates the direction of  
622 recombination, with blue representing VVV as 5'-acceptor and VDD as 3'-donor and those in red  
623 with VDD as 5'-acceptor and VVV as 3'-donor. **b.** The most frequently observed recombination  
624 junctions in all pupal samples analysed, shown at the recombination junction between VVV and  
625 VDD genomes. The junctions shown in black occurred with similar frequency in both directions.  
626 Those shown in blue occurred predominantly with VVV as 5'-acceptor and VDD as 3'-donor and  
627 those in red with VDD as 5'-acceptor and VVV as 3'-donor sequences.

**a.**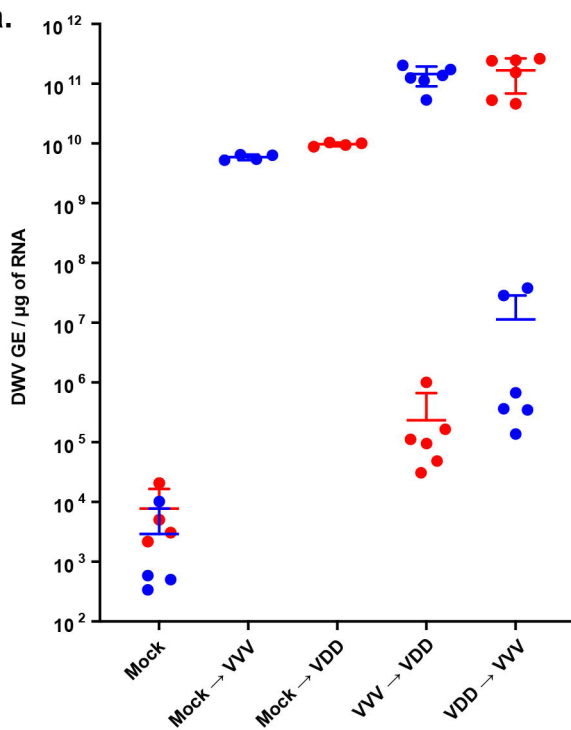**b.**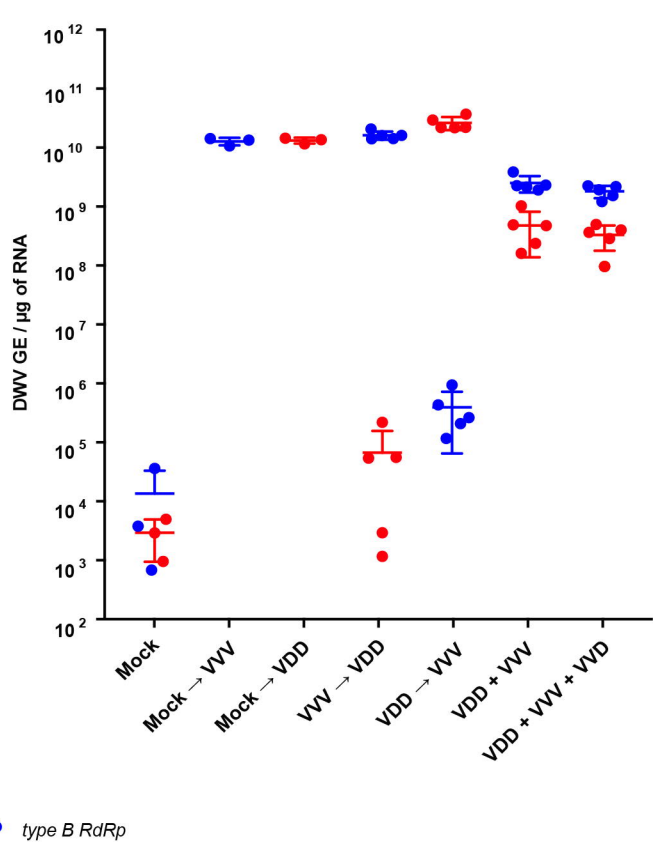

● type A RdRp ● type B RdRp

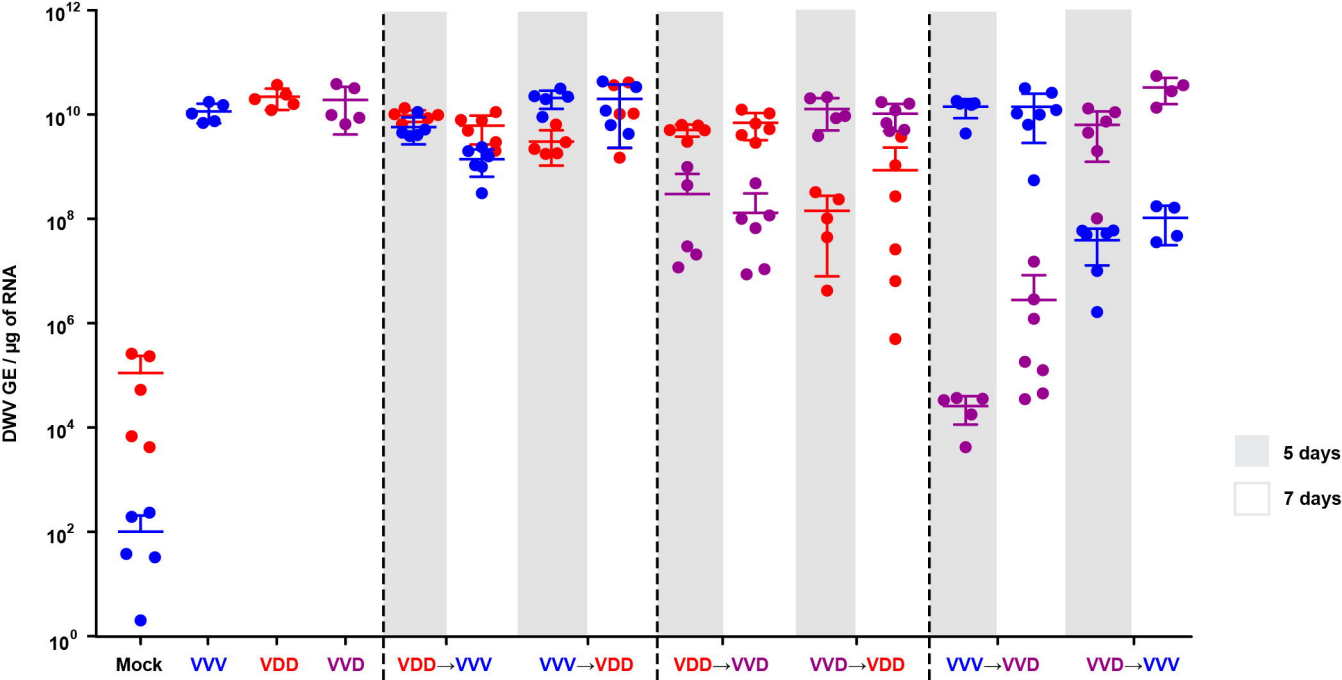

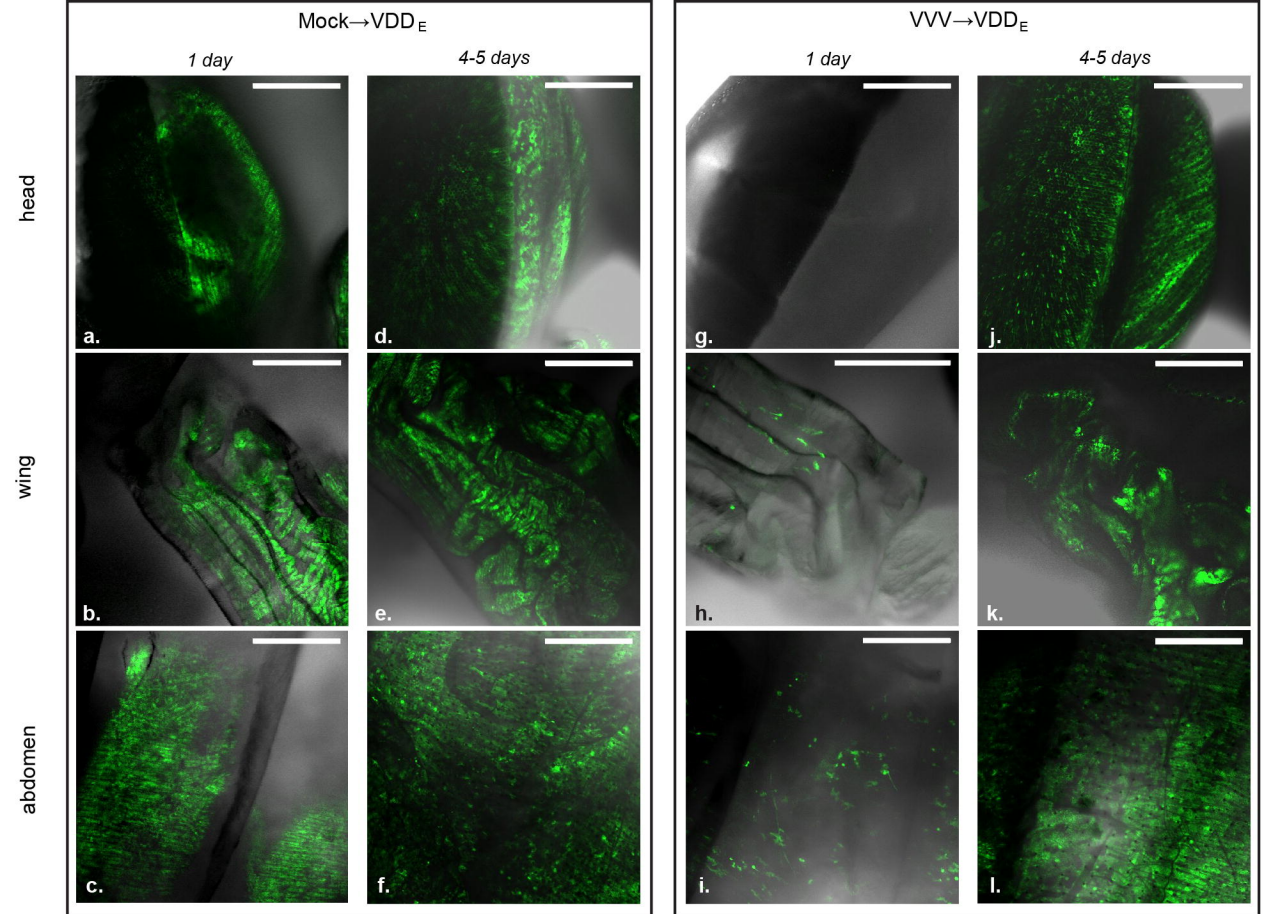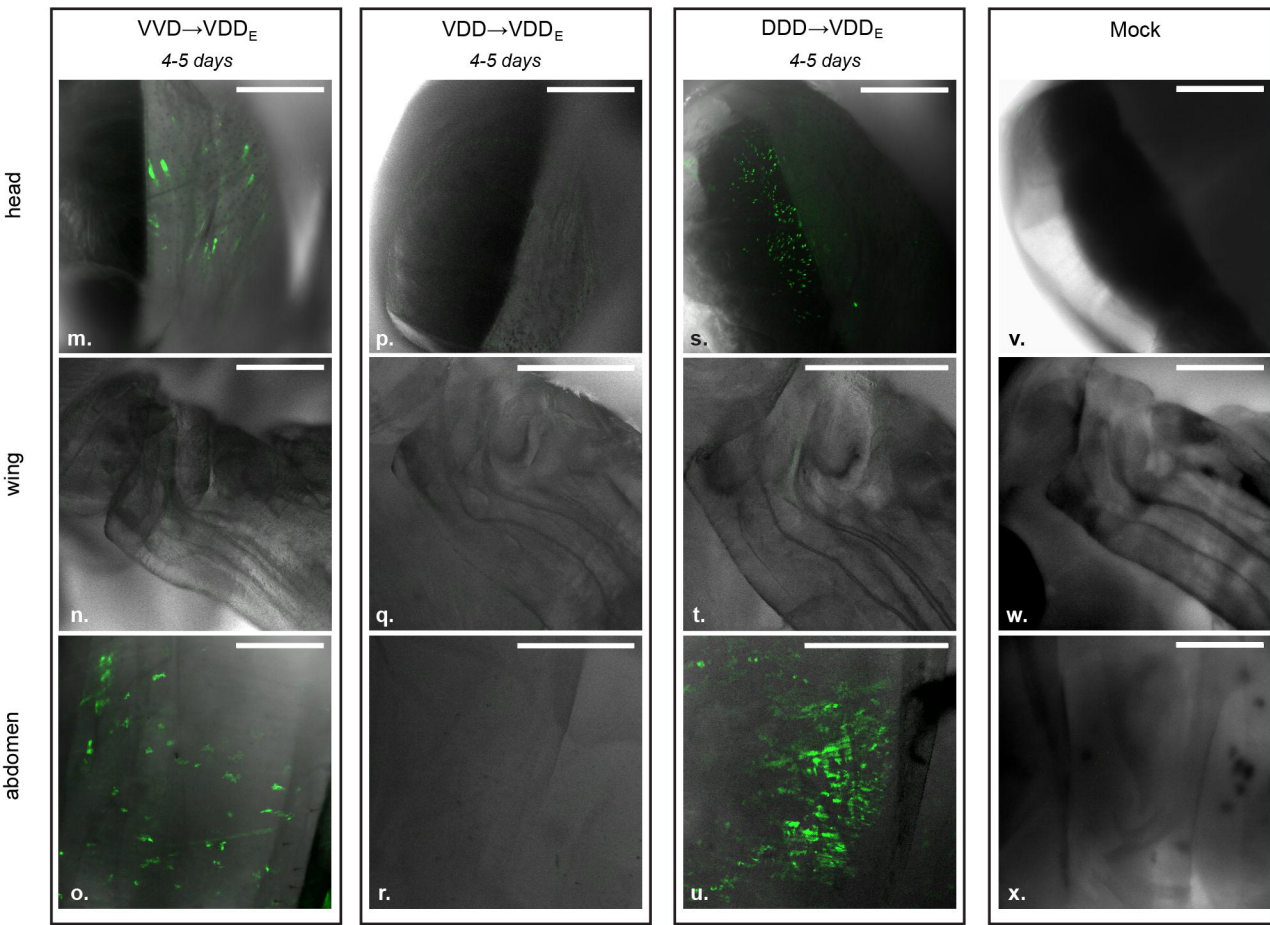

**a.**VDD<sub>E</sub> + VVV<sub>mc</sub>

abdomen

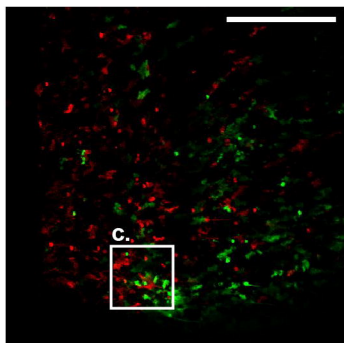**c.**

rectum (dissected pupa)

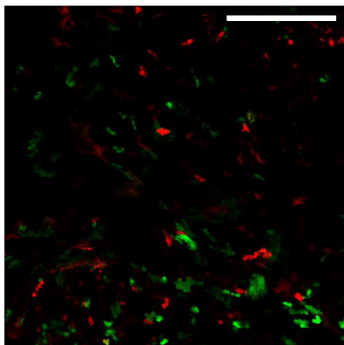VVD<sub>E</sub> + VVV<sub>mc</sub>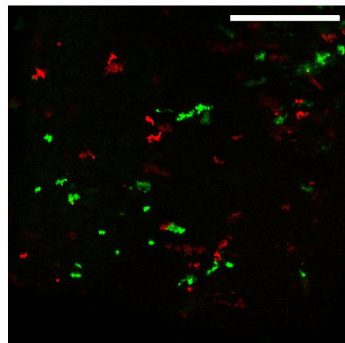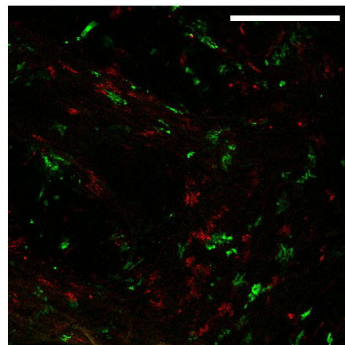**b.**VDD<sub>E</sub> → VVV<sub>mc</sub>

abdomen

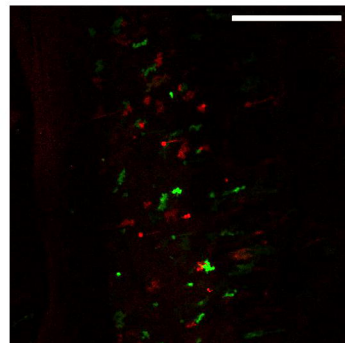Mock → VVV<sub>mc</sub>

abdomen

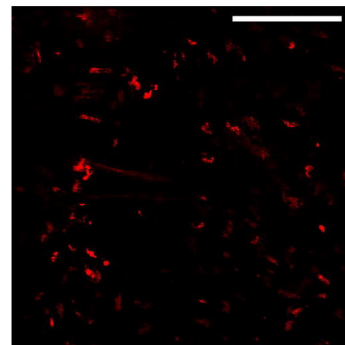**c.**

EGFP

mCherry

combined

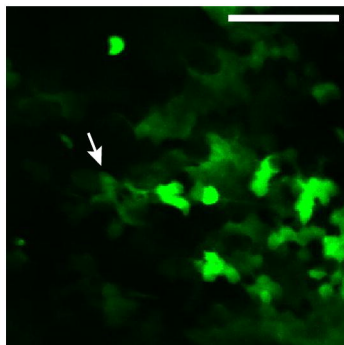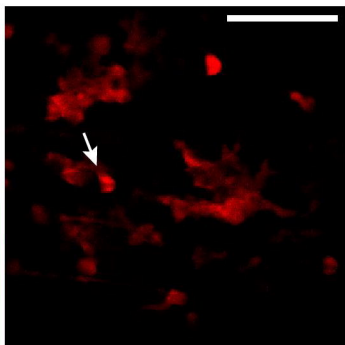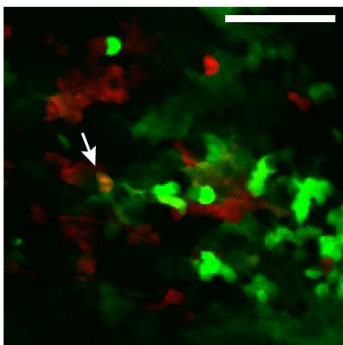

**a.**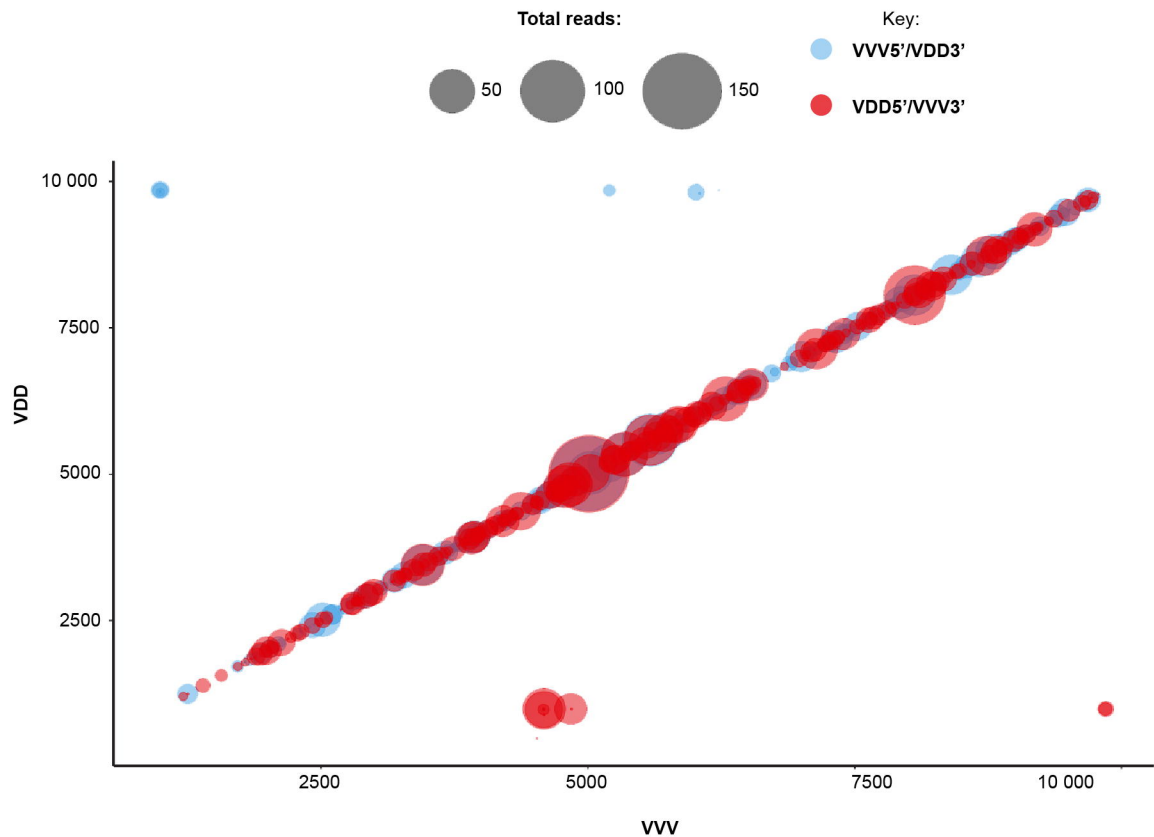**b.**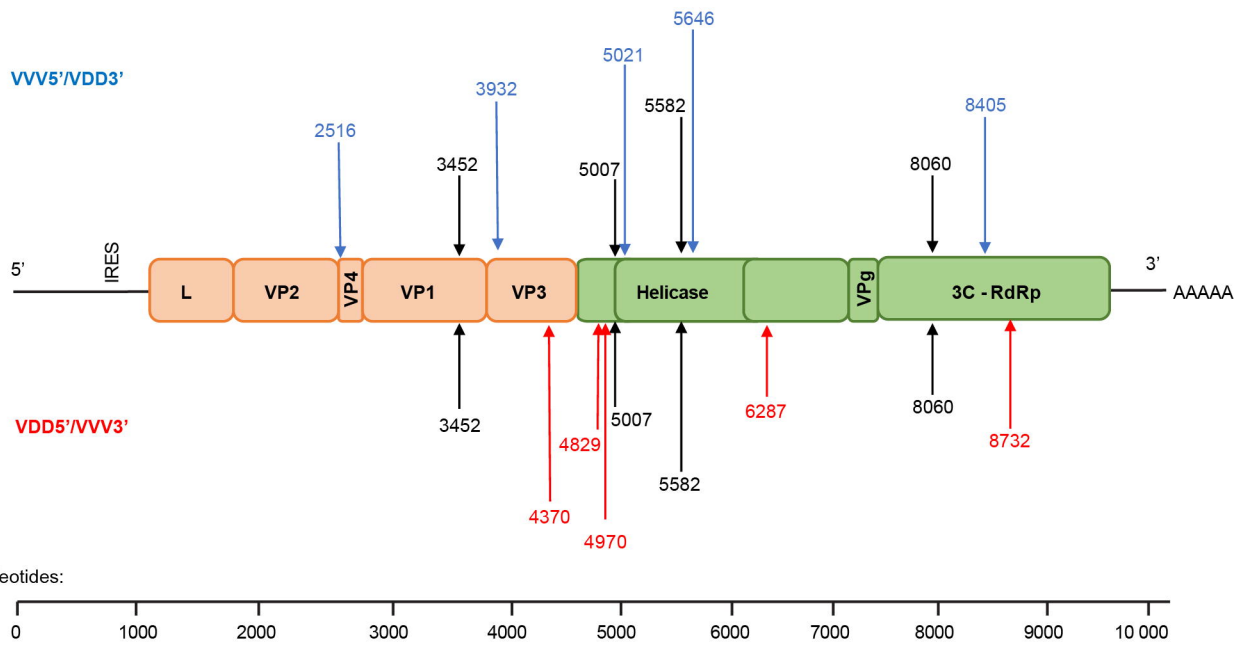

Source: https://www.biorxiv.org/content/10.1101/2021.03.22.436467v1.full.pdf
